# Supplementary material for: Flyways and migratory behaviour of the Vega gull (Larus vegae), a little-known Arctic endemic
Source: PLOS journal article supplement (doi:10.1371/journal.pone.0281827), 2023-02-16
Supplement: S9 (10.1371/journal.pone.0281827.s009) [file journal.pone.0281827.s009]

## SUPPORTING INFORMATION

### Flyways and migratory behaviour of the Vega gull (*Larus vegae*), a little-known arctic endemic

Olivier Gilg<sup>1,2</sup>, Rob S.A. van Bemmelen<sup>3</sup>, Hansoo Lee<sup>4</sup>, Jin-Young Park<sup>5</sup>, Hwa-Jung Kim<sup>5</sup>, Dong-Won Kim<sup>5</sup>, Won Y. Lee<sup>6</sup>, Kristaps Sokolovskis<sup>7</sup> and Diana V. Solovyeva<sup>8</sup>.

| Spring migration                 |                          |                      |                    | Autumn migration         |                      |                    |
|----------------------------------|--------------------------|----------------------|--------------------|--------------------------|----------------------|--------------------|
| Year                             | Start<br>(earliest bird) | End<br>(latest bird) | Duration<br>(days) | Start<br>(earliest bird) | End<br>(latest bird) | Duration<br>(days) |
| 2015                             | 1/5                      | 3/6                  | 34                 | 12/8                     | 10/11                | 91                 |
| 2016                             | 2/4                      | 31/5                 | 60                 | 20/7                     | 10/11                | 114                |
| 2017                             | 14/4                     | 31/5                 | 48                 | 12/9                     | 11/12                | 91                 |
| 2018                             | 25/4                     | 2/6                  | 39                 | 25/8                     | 15/11                | 83                 |
| 2019                             | 24/4                     | 26/5                 | 33                 | 5/9                      | 11/12                | 98                 |
| Median dates &<br>mean durations | 24/4                     | 31/5                 | 43                 | 25/8                     | 15/11                | 95                 |

  

| Winter range (<40.9°N)           |                            |                             |                    | Summer range (>64.9°N)      |                            |                    |
|----------------------------------|----------------------------|-----------------------------|--------------------|-----------------------------|----------------------------|--------------------|
| Year                             | Departing<br>(latest bird) | Arriving<br>(earliest bird) | Duration<br>(days) | Arriving<br>(earliest bird) | Departing<br>(latest bird) | Duration<br>(days) |
| 2015                             | 18/5                       | 10/9                        | 251                | 23/5                        | 9/9                        | 110                |
| 2016                             | 14/5                       | 29/9                        | 229                | 29/5                        | 9/9                        | 104                |
| 2017                             | 10/5                       | 19/10                       | 204                | 21/5                        | 4/10                       | 137                |
| 2018                             | 16/5                       | 19/10                       | 210                | 31/5                        | 6/10                       | 129                |
| 2019                             | 17/5                       | 26/10                       | 204                | 23/5                        | 2/10                       | 133                |
| Median dates &<br>mean durations | 16/5                       | 19/10                       | 220                | 23/5                        | 2/10                       | 123                |

**S2 Table. Population migratory windows and periods spent on winter grounds and breeding range for the 21 Vega gulls monitored between 2015 and 2019 (same individuals than on Fig 2A).**
